# Supplementary material
Source: PubMed Central journal article supplement (PMC7469535)
Supplement: KAUP_A_1659573_SM9723.pdf [file KAUP_A_1659573_SM9723.pdf]

**The transcription factor Spt4-Spt5 complex regulates the expression of *ATG8* and *ATG41***

Xin Wen, Damián Gatica, Zhangyuan Yin, Zehan Hu, Jörn Dengjel and Daniel J. Klionsky

Supplementary data

**Table S1.** Strains used in this study.

| Name    | Genotype                                                                                                                                                            | Ref        |
|---------|---------------------------------------------------------------------------------------------------------------------------------------------------------------------|------------|
| BY4741  | MAT $\alpha$ <i>his3<math>\Delta</math>1 leu2<math>\Delta</math>0 met15<math>\Delta</math>0 ura3<math>\Delta</math>0</i>                                            | [1]        |
| BY4742  | MAT $\alpha$ <i>his3<math>\Delta</math>1 leu2<math>\Delta</math>0 lys2<math>\Delta</math>0 ura3<math>\Delta</math>0</i>                                             | [1]        |
| DGY047  | WLY176 <i>SPT5-MYC::TRP1</i>                                                                                                                                        | This study |
| DGY048  | WLY176 <i>SPT5-MYC S1009A S1015A S1025A S1032A S1043A S1052A S1058A::TRP1</i>                                                                                       | This study |
| DGY049  | WLY176 <i>SPT5-MYC S1009E S1015E S1025E S1032E S1043E S1052E S1058E::TRP1</i>                                                                                       | This study |
| DGY050  | WLY176 <i>GFP-ATG8(405)::LEU2 SPT5-MYC::TRP1</i>                                                                                                                    | This study |
| DGY051  | WLY176 <i>GFP-ATG8(405)::LEU2 SPT5-MYC S1009A S1015A S1025A S1032A S1043A S1052A S1058A::TRP1</i>                                                                   | This study |
| DGY052  | WLY176 <i>GFP-ATG8(405)::LEU2 SPT5-MYC S1009E S1015E S1025E S1032E S1043E S1052E S1058E::TRP1</i>                                                                   | This study |
| JMY97   | WLY176, <i>ume6<math>\Delta</math>::HIS3</i>                                                                                                                        | [2]        |
| JMY347  | SEY6210, <i>ZEO1p-pho13<math>\Delta</math> pho8<math>\Delta</math>60, CUP1p-GFP-ATG8(405)::LEU2</i>                                                                 | This study |
| SEY6210 | MAT $\alpha$ <i>leu2-3,112 ura3-52 his3-<math>\Delta</math>200 trp1-<math>\Delta</math>901 suc2-<math>\Delta</math>19 lys2-801; GAL</i>                             | [1]        |
| TVY1    | MAT $\alpha$ <i>leu2-3,112 ura3-52 his3-<math>\Delta</math>200 trp1-<math>\Delta</math>901 lys2-801 suc2-<math>\Delta</math>9 GAL pep4<math>\Delta</math>::LEU2</i> | [3]        |
| WLY176  | SEY6210 <i>pho13<math>\Delta</math> pho8<math>\Delta</math>60</i>                                                                                                   | [4]        |
| WXY100  | TVY1 <i>spt4<math>\Delta</math>::HIS3</i>                                                                                                                           | This study |
| WXY101  | TVY1 <i>bur2<math>\Delta</math>::URA3</i>                                                                                                                           | This study |
| WXY102  | WLY176 <i>SPT5-PA::TRP1</i>                                                                                                                                         | This study |
| WXY103  | WLY176 <i>spt4<math>\Delta</math>::KAN SPT5-PA::TRP1</i>                                                                                                            | This study |
| WXY104  | WLY176 <i>bur2<math>\Delta</math>::URA3 SPT5-PA::TRP1</i>                                                                                                           | This study |
| WXY105  | WLY176 <i>spt4<math>\Delta</math>::HIS3</i>                                                                                                                         | This study |
| WXY106  | WLY176 <i>SPT4-PA::TRP1</i>                                                                                                                                         | This study |
| WXY107  | WLY176 <i>SPT5-GFP::KAN</i>                                                                                                                                         | This study |
| WXY108  | WLY176 <i>ATG5-PA::TRP1</i>                                                                                                                                         | This study |
| WXY109  | WLY176 <i>spt4<math>\Delta</math>::KAN ATG5-PA::TRP1</i>                                                                                                            | This study |
| WXY110  | WLY176 <i>ATG20-PA::TRP1</i>                                                                                                                                        | This study |
| WXY111  | WLY176 <i>spt4<math>\Delta</math>::URA3 ATG20-PA::TRP1</i>                                                                                                          | This study |
| WXY112  | WLY176 <i>CUP1p-GFP-ATG8(405)::LEU2</i>                                                                                                                             | This study |
| WXY113  | WLY176 <i>spt4<math>\Delta</math>::URA3 CUP1p-GFP-ATG8(405)::LEU2</i>                                                                                               | This study |
| WXY114  | ZYY108 <i>spt4<math>\Delta</math>::URA3</i>                                                                                                                         | This study |
| WXY115  | WLY176 <i>bur2<math>\Delta</math>::KAN</i>                                                                                                                          | This study |
| WXY116  | WLY176 <i>bur2<math>\Delta</math>::KAN ATG41-PA::TRP1</i>                                                                                                           | This study |
| WXY117  | WLY176 <i>SPT5-PA::TRP1 SGV1-MYC::KAN</i>                                                                                                                           | This study |
| WXY120  | WLY176 <i>rim15<math>\Delta</math>::URA3 SPT5-PA::TRP1 SGV1-MYC::KAN</i>                                                                                            | This study |
| WXY121  | BY4741 <i>vac8<math>\Delta</math>::HIS3</i>                                                                                                                         | This study |
| WXY122  | BY4741 <i>spt4<math>\Delta</math>::URA3 vac8<math>\Delta</math>::HIS3</i>                                                                                           | This study |
| WXY123  | WLY176 <i>rim15<math>\Delta</math>::URA3</i>                                                                                                                        | This study |

|        |                                                                               |            |
|--------|-------------------------------------------------------------------------------|------------|
| WXY124 | ZYY108 <i>rim15Δ::URA3</i>                                                    | This study |
| WXY125 | WLY176, <i>pNHK53::URA3 SPT5-AID-MYC::KAN</i>                                 | This study |
| WXY126 | SEY6210, <i>atg1Δ::HIS3</i>                                                   | This study |
| WXY127 | ZYY108 <i>SPT5-MYC::TRP1</i>                                                  | This study |
| WXY128 | ZYY108 <i>SPT5-MYC S1009A S1015A S1025A S1032A S1043A S1052A S1058A::TRP1</i> | This study |
| WXY129 | ZYY108 <i>ume6Δ::URA3</i>                                                     | This study |
| WXY130 | ZYY124 <i>spt4Δ::URA3</i>                                                     | This study |
| WXY131 | JMY347, <i>spt4Δ::URA3</i>                                                    | This study |
| WXY132 | ZYY108 <i>SPT5-MYC S1009E S1015E S1025E S1032E S1043E S1052E S1058E::TRP1</i> | This study |
| WXY133 | WXY125, <i>CUP1p-GFP-ATG8(405)::LEU2</i>                                      | This study |
| WXY134 | WXY125, <i>ATG41-PA::TRP1</i>                                                 | This study |
| YZY007 | BY4742 <i>arg4Δ::URA3</i>                                                     | This study |
| YZY076 | BY4742 <i>arg4Δ::URA3 rim15Δ::KAN</i>                                         | This study |
| ZYY108 | WLY176 <i>ATG41-PA::HIS3</i>                                                  | [5]        |
| ZYY124 | WLY176 <i>GCN4-PA::LEU2</i>                                                   | [5]        |

### Supplemental references

- [1] Winston F, Dollard C, Ricupero-Hovasse SL. Construction of a set of convenient *Saccharomyces cerevisiae* strains that are isogenic to S288C. *Yeast*. 1995;11:53-5.
- [2] Bartholomew CR, Suzuki T, Du Z, Backues SK, Jin M, Lynch-Day MA, et al. Ume6 transcription factor is part of a signaling cascade that regulates autophagy. *Proc Natl Acad Sci U S A*. 2012;109:11206-10.
- [3] Gerhardt B, Kordas TJ, Thompson CM, Patel P, Vida T. The vesicle transport protein Vps33p is an ATP-binding protein that localizes to the cytosol in an energy-dependent manner. *J Biol Chem*. 1998;273:15818-29.
- [4] Kanki T, Wang K, Baba M, Bartholomew CR, Lynch-Day MA, Du Z, et al. A genomic screen for yeast mutants defective in selective mitochondria autophagy. *Mol Biol Cell*. 2009;20:4730-8.
- [5] Yao Z, Delorme-Axford E, Backues SK, Klionsky DJ. Atg41/Icy2 regulates autophagosome formation. *Autophagy*. 2015;11:2288-99.

**Table S2.** Oligonucleotide primers used in this study.

| Name       | Sequence                         | Use                                                           |
|------------|----------------------------------|---------------------------------------------------------------|
| ATG1_F     | ATCTAAGATGGCCGCACATATG           | <i>ATG1</i> mRNA level check                                  |
| ATG1_R     | AGGGTAGTCACCATAGGCATTC           | <i>ATG1</i> mRNA level check                                  |
| ATG5_F     | TCGGTCAACGAAGCTCGAAA             | <i>ATG5</i> mRNA level check                                  |
| ATG5_R     | GATGAGCGGTATATGTCGCG             | <i>ATG5</i> mRNA level check                                  |
| ATG7_F     | ATGAGCATTGTCCAGCATGTAG           | <i>ATG7</i> mRNA level check                                  |
| ATG7_R     | GACCTCCTGCTTTATGACTGAC           | <i>ATG7</i> mRNA level check                                  |
| ATG8_F     | GAAGGCCATCTTCATTTTTGTC           | <i>ATG8</i> mRNA level check                                  |
| ATG8_R     | TTCTCCTGAGTAAGTGACATAC           | <i>ATG8</i> mRNA level check                                  |
| ATG9_F     | CGTACTAACAGAGTCTTTCCTTG          | <i>ATG9</i> mRNA level check                                  |
| ATG9_R     | CTAAGACACCACCCTTATTGAG           | <i>ATG9</i> mRNA level check                                  |
| ATG20_F    | CAGGTAGCGGTGGGAAATCA             | <i>ATG20</i> mRNA level check                                 |
| ATG20_R    | TGCGGTATGCGGATCTGTTT             | <i>ATG20</i> mRNA level check                                 |
| ATG41_F    | CGAGTACTGAAGACGATTGCAT           | <i>ATG41</i> mRNA level check<br><i>ATG41</i> ChIP-qPCR check |
| ATG41_R    | TGCGACATTGGCAAAGGCAT             | <i>ATG41</i> mRNA level check<br><i>ATG41</i> ChIP-qPCR check |
| YAT1_F     | CTCGGTTTGCCTCGCTCATG             | <i>YAT1</i> mRNA level check                                  |
| YAT1_R     | GTAGCCGGACAACAGGTATT             | <i>YAT1</i> mRNA level check                                  |
| ALG9_F     | CACGGATAGTGGCTTTGGTGAACAATTAC    | RT-qPCR check                                                 |
| ALG9_R     | TATGATTATCTGGCAGCAGGAAAGAACTTGGG | RT-qPCR check                                                 |
| TFC1_F     | GCTGGCACTCATATCTTATCGTTTCACAATGG | ChIP-qPCR check                                               |
| TFC1_R     | GAACCTGCTGTCAATACCGCCTGGAG       | ChIP-qPCR check                                               |
| ATG1-500_F | TCCTTGTTTCGTTTCGTGTATCTG         | <i>ATG1</i> ChIP-qPCR check                                   |

|             |                                |                              |
|-------------|--------------------------------|------------------------------|
| ATG1-500_R  | GGTTTAAGAAATCAGAGCCGAGC        | <i>ATG1</i> ChIP-qPCR check  |
| ATG1+80_F   | TAAAGATCACACAACCTCTGTGAACC     | <i>ATG1</i> ChIP-qPCR check  |
| ATG1+80_R   | GATACTTCCTTTATGGCTACATGCTG     | <i>ATG1</i> ChIP-qPCR check  |
| ATG1+330_R  | ATTGACTGTGAACGAACATCAACAG      | <i>ATG1</i> ChIP-qPCR check  |
| ATG1+330_F  | GGTTCTCACTCGGTGGAGGGTATTT      | <i>ATG1</i> ChIP-qPCR check  |
| ATG41-100_F | GCGGCTCTGCGTAAAAAGGT           | <i>ATG41</i> ChIP-qPCR check |
| ATG41-100_R | TTGGTTGGTTTGGTGTAGCC           | <i>ATG41</i> ChIP-qPCR check |
| ATG41+20_F  | GGCTACACCAAACCAACCAA           | <i>ATG41</i> ChIP-qPCR check |
| ATG41+20_R  | GGCTCGAAAGCAACGTTTGA           | <i>ATG41</i> ChIP-qPCR check |
| ATG41+110_F | TCAAACGTTGCTTTCGAGCC           | <i>ATG41</i> ChIP-qPCR check |
| ATG41+110_R | GTGCATTCTGACTCATCGAC           | <i>ATG41</i> ChIP-qPCR check |
| ATG41+200_F | TTTTCCGCTATCGTACCCGA           | <i>ATG41</i> ChIP-qPCR check |
| ATG41+200_R | TCCTTACTAGCAGCAGCAAC           | <i>ATG41</i> ChIP-qPCR check |
| ATG8-20_F   | GGAACCATTAAAGGTTGAGGAG         | <i>ATG8</i> ChIP-qPCR check  |
| ATG8-20_R   | AATCCTCTCCGACTCCGCCTTC         | <i>ATG8</i> ChIP-qPCR check  |
| ATG8+50_F   | ACTAGAGACATGAAGTCTACATTAAAGTCT | <i>ATG8</i> ChIP-qPCR check  |
| ATG8+50_R   | TCAGCAGGAACTAGATATTTACGCTTATCA | <i>ATG8</i> ChIP-qPCR check  |
| ATG8+150_F  | GGAGAGGATTGCTGACAGGTTCAAG      | <i>ATG8</i> ChIP-qPCR check  |
| ATG8+150_R  | AAATGAAGATGGCCTTCTCAGGGGG      | <i>ATG8</i> ChIP-qPCR check  |

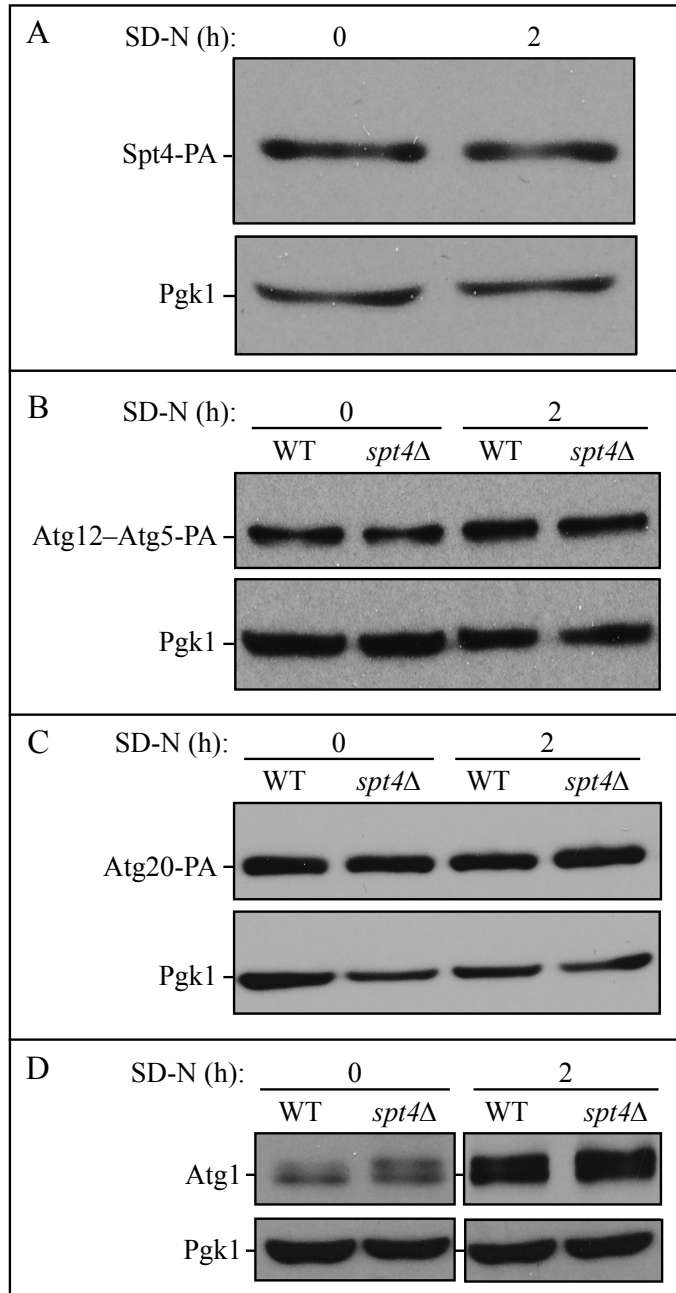

**Figure S1.** Spt4 protein level does not change after starvation, and protein levels of Atg5, Atg20 and Atg1 remain similar in *spt4Δ* cells. (A) Samples were collected from a strain expressing PA-tagged Spt4 (WXY106) under both growing and starvation conditions, and protein extracts were analyzed by western blot using antibodies to PA; Pgk1 was used as the loading control. (B-C) The anti-PA antibody was used to detect Atg5 (as the Atg12-Atg5 conjugate) and Atg20 protein levels, by probing for the PA tag in wild-type (WXY108, WXY110) and *spt4Δ* (WXY109, WXY111) cells in growing (YPD) and starvation (SD-N, t=2 h) conditions. Pgk1 was used as a loading control. (D) Samples from the wild-type (WLY176) and *spt4Δ* (WXY105) strains were collected in growing (YPD) and starvation (SD-N, t=2 h) conditions. The samples were analyzed by western blot with anti-Atg1 antibodies; Pgk1 was used as a loading control.

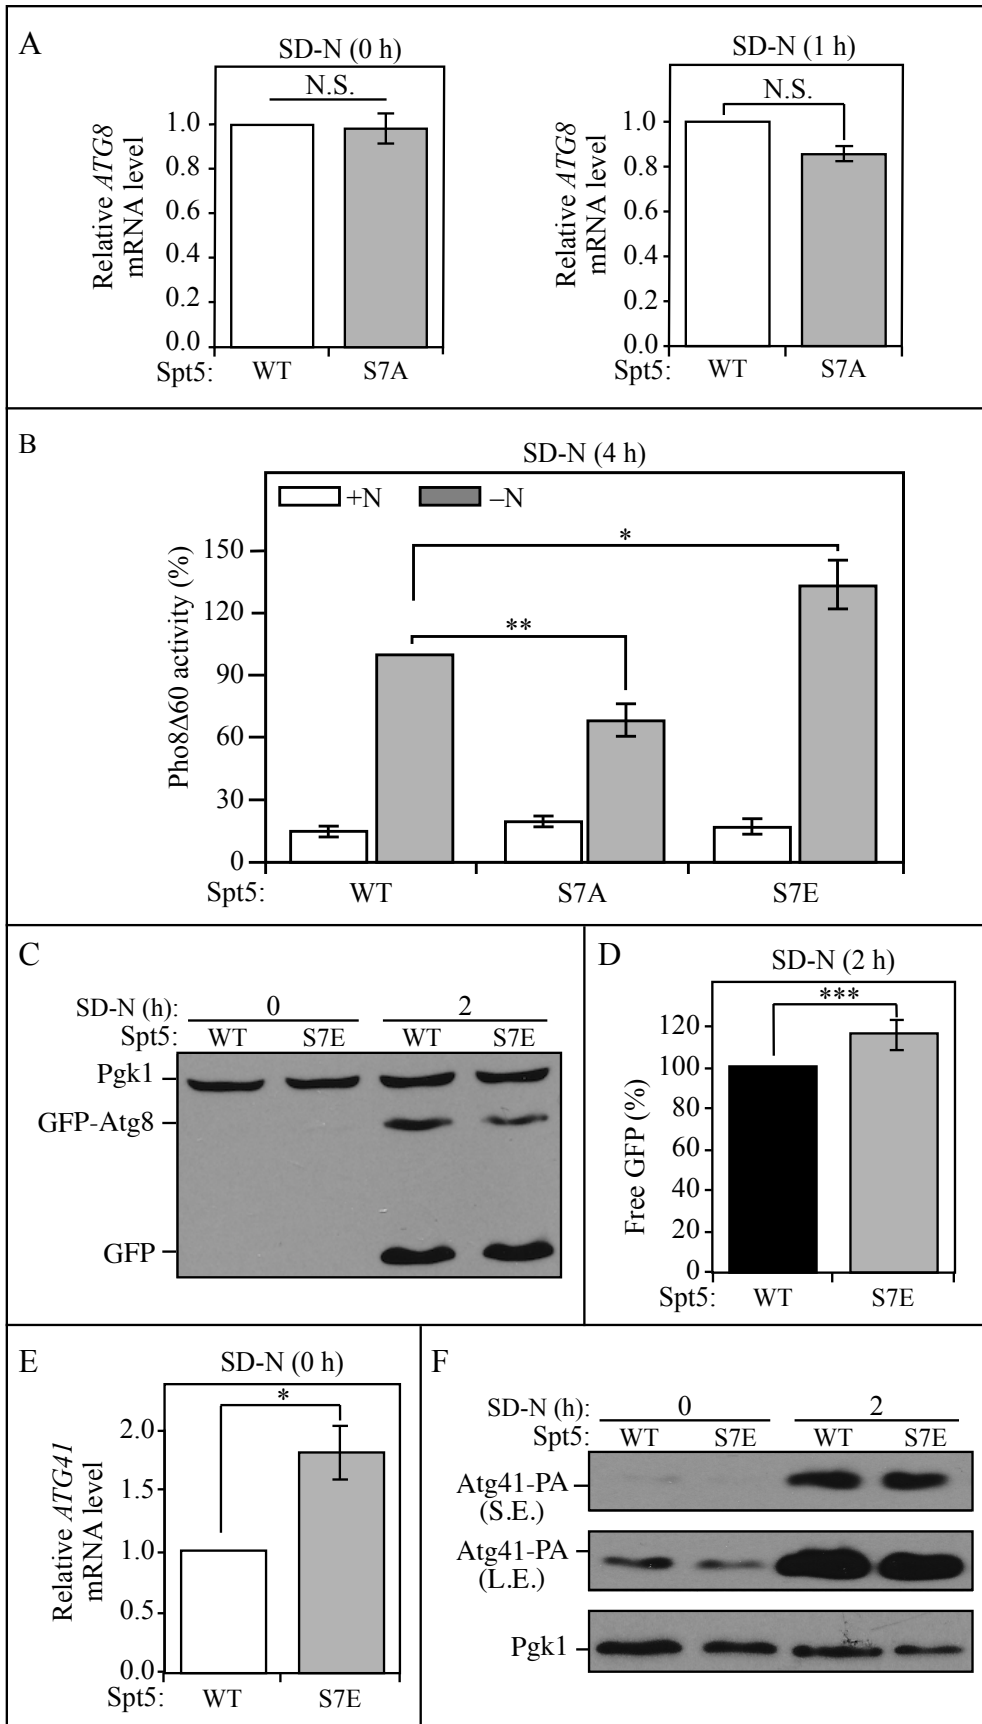

**Figure S2.** Autophagy activity and *ATG41*/Atg41 expression are upregulated in cells expressing phosphomimetic Spt5[S7E]. **(A)** The RT-qPCR analysis of the *ATG8* mRNA level in WT (DGY047) and Spt5[S7A] (DGY048) cells in growing and starvation conditions. Error bars represent the SEM of at least 3 independent experiments, and WT was set as 1 in both conditions; other values were normalized. N.S., not significant. **(B)** Autophagy was measured with the quantitative Pho8 $\Delta$ 60 assay in WT (DGY047), Spt5[S7A] (DGY048) and Spt5[S7E] (DGY049) cells under growing conditions (+N) and after 4 h of nitrogen starvation (-N). Error bars represent the SEM of at least 3 independent experiments. \*,  $p < 0.05$ ; \*\*,  $p < 0.01$ . **(C-D)** Autophagy activity was measured with the GFP-Atg8 processing assay in WT (DGY050) and Spt5[S7E] (DGY052) cells. Proteins were analyzed by western blot with anti-YFP antibody and anti-Pgk1 (loading control) antiserum. The quantitative analysis of processed GFP after starvation is shown in **(D)**, and the error bar represents the SEM of 3 independent experiments. The processed GFP ratio after starvation has been set as 1, and other values were normalized. \*\*\*,  $p < 0.005$ . **(E)** The mRNA level of *ATG41* was measured by RT-qPCR in WT (DGY047) and Spt5[S7E] (DGY049) cells in growing conditions. Error bars represent the SEM of at least 3 independent experiments, and WT was set as 1; other values were normalized. \*,  $p < 0.05$ . **(F)** The Atg41-PA protein level was tested by western blot and analyzed using anti-PA antibody in WT (WXY127) and Spt5[S7E] (WXY132) cells.



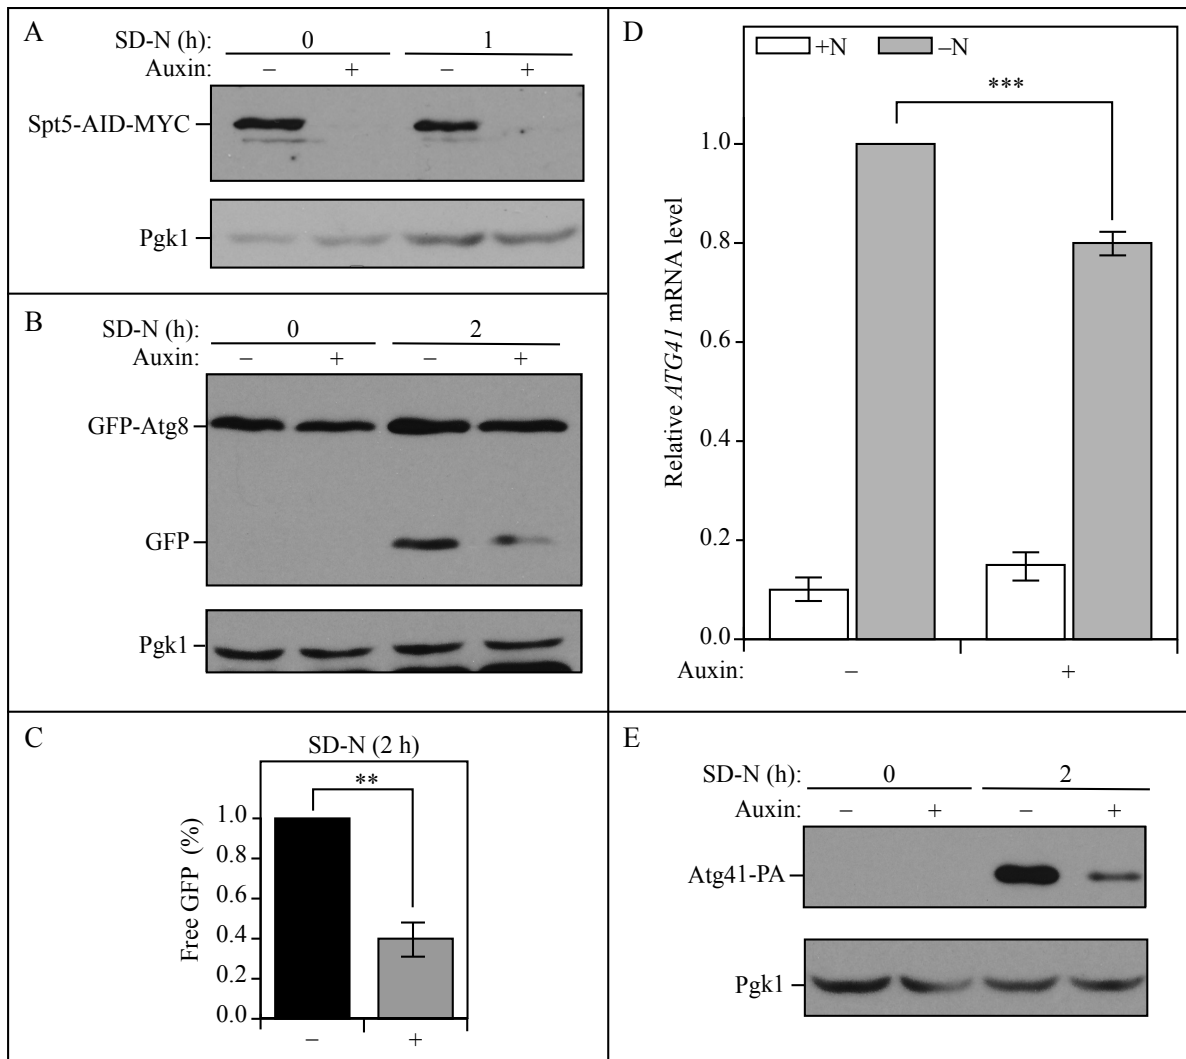

**Figure S3.** The temporal depletion of Spt5 using an Spt5-inducible degradation strain leads to decreased autophagy activity. **(A)** Spt5 levels were measured by western blot in an Spt5 auxin-inducible degron (AID) strain (WXY125) in both nutrient-rich and starvation conditions in the presence of DMSO (vehicle) or 300  $\mu$ M auxin; the loss of Spt5-AID-MYC was detected with anti-MYC antibody after auxin treatment. **(B-C)** Autophagy activity was measured by the GFP-Atg8 processing assay. The Spt5-AID-MYC strain (WXY133) was incubated with DMSO or auxin in both growing (YPD, mid-log phase) and starvation (SD-N,  $t=2$  h) conditions. Anti-YFP antibody and anti-Pgk1 (loading control) antiserum were used to detect the corresponding proteins. The quantitative analysis of processed GFP is shown in **(C)**, and the error bar represents the SEM of 3 independent experiments. The processed GFP after 2 h of starvation was set as 1, and other values were normalized. **(D)** The mRNA level of *ATG41* was quantified by RT-qPCR in both growing (+N) and starvation (-N) conditions. The value of the strain treated with DMSO in -N was set as 1, and other values were normalized. The error bars indicate the SEM of at least 3 independent experiments. \*\*\*,  $p < 0.005$ . **(E)** Anti-PA antibody was used to detect the protein level of Atg41-PA in the Spt5-AID-MYC strain (WXY134) when the strain was incubated with DMSO or auxin in either growing (SD-N,  $t=0$  h) or starvation (SD-N,  $t=2$  h) conditions.

**Figure S4.** The nonphosphorylatable mutant of Spt5 in the Spt5-inducible degradation strain displays a decreased *ATG41* mRNA level. **(A)** The centromeric *HIS3*-marked Spt5 WT (WT) and Spt5[S15A] (MUT) plasmids were transformed into the Spt5-inducible degradation strain (WXY125). The anti-p-Spt5 antibody was used to detect Spt5 phosphorylation after starvation. **(B)** The mRNA level of *ATG41* and *ATG8* were quantified by RT-qPCR in Spt5-AID-MYC strains with WT and MUT plasmids incubated with DMSO and auxin in the nutrient-depleted condition. The value of WT with auxin was set as 1, and other values were normalized. The error bars indicate the SEM of at least 3 independent experiments. N.S., not significant; \*\*\*,  $p < 0.005$ .

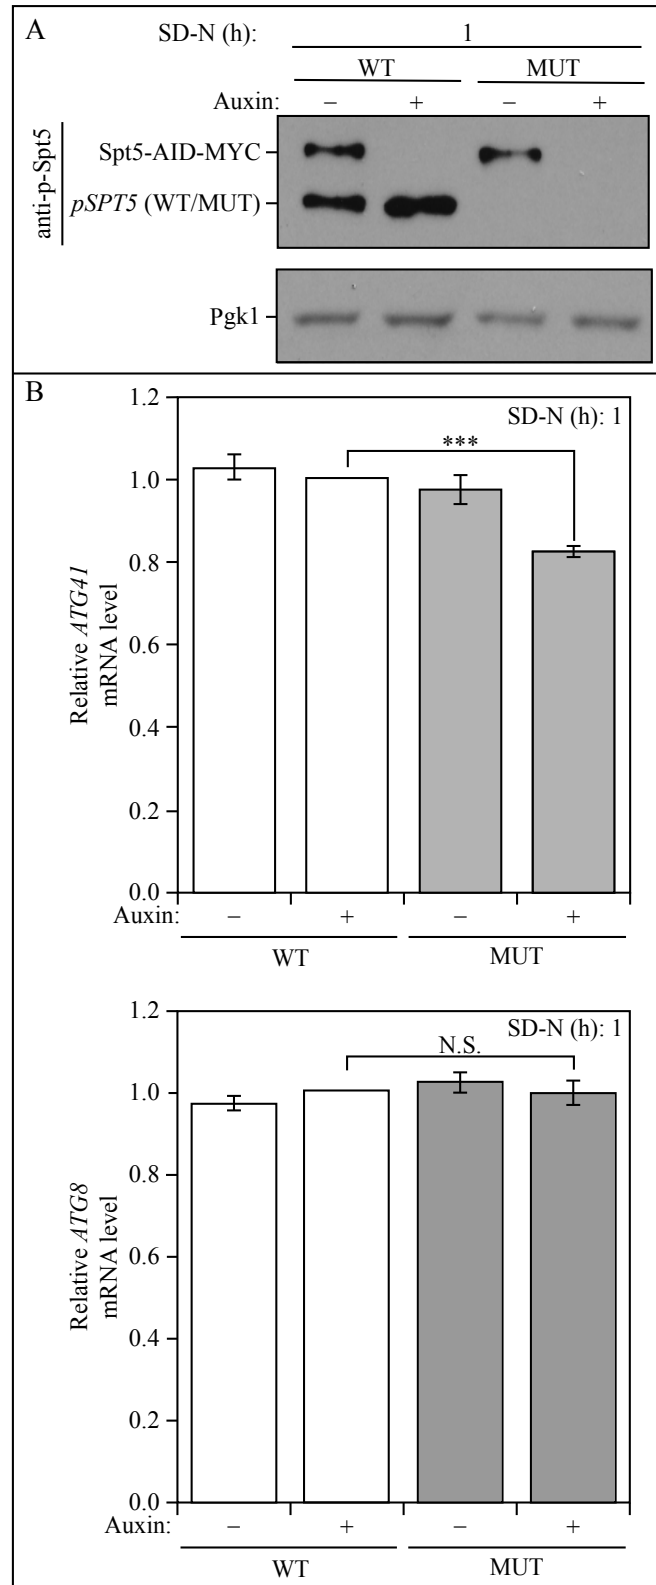

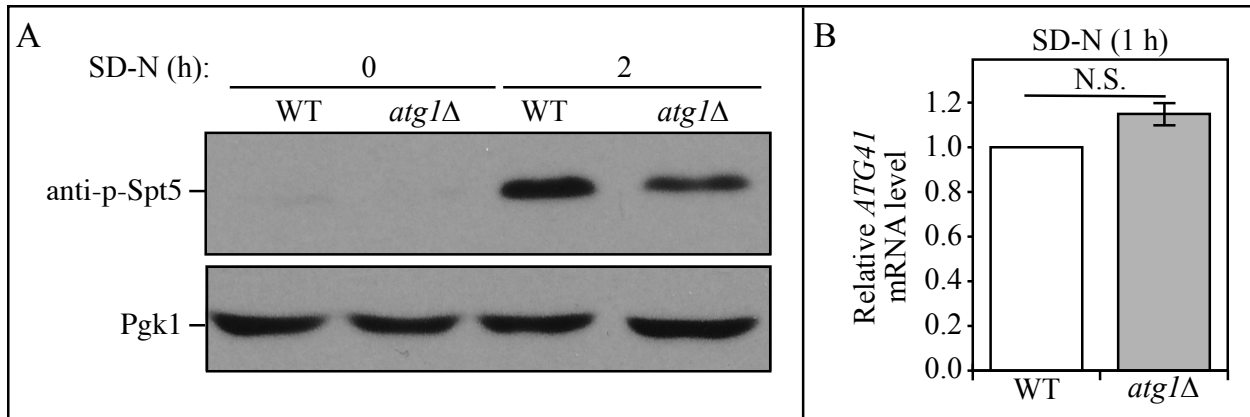

**Figure S5.** The deletion of *ATG1* results in a partial block of Spt5 phosphorylation but has no effect on *ATG41*. **(A)** The phosphorylation of Spt5 was detected with anti-p-Spt5 antibody in western blot samples of WT (SEY6210) and *atg1Δ* (WXY126) cells collected from growing and starvation (SD-N=2 h) conditions. **(B)** The RT-qPCR analysis of *ATG41* mRNA level in WT and *atg1Δ* cells after starvation. Error bars represent the SEM of at least 3 independent experiments, and WT was set as 1; the other value was normalized. N.S., not significant.

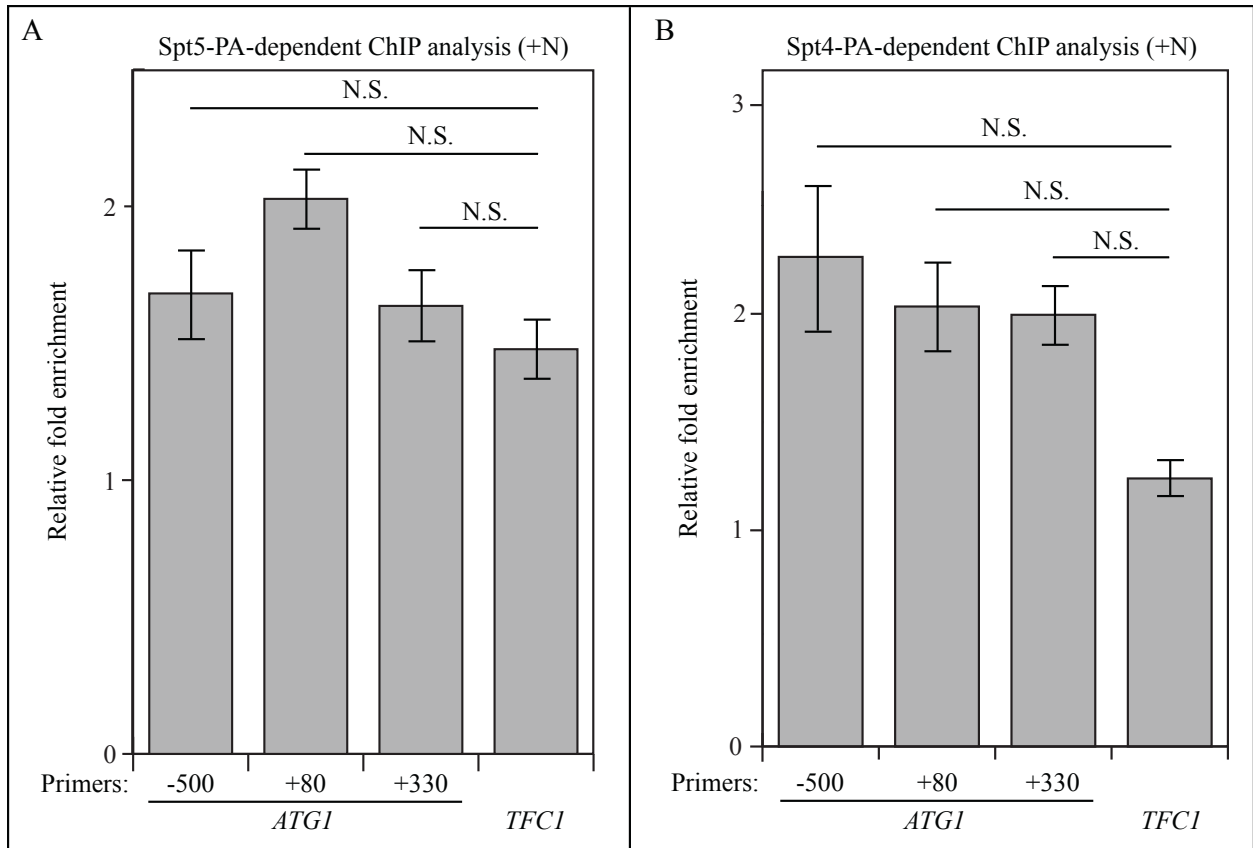

**Figure S6.** ChIP analysis shows that Spt5 and Spt4 may not bind to *ATG1* DNA. **(A-B)** ChIP analysis was conducted using the protein A-tagged **(A)** Spt5 (WXY102) and **(B)** Spt4 (WXY106) strains on 3 regions of DNA at the *ATG1* locus: -500 base pairs (bps), +80 bps, and +330 bps. The ChIP results were normalized to the input DNA, and *TFC1* was used as a negative control for both strains. N.S., not significant.

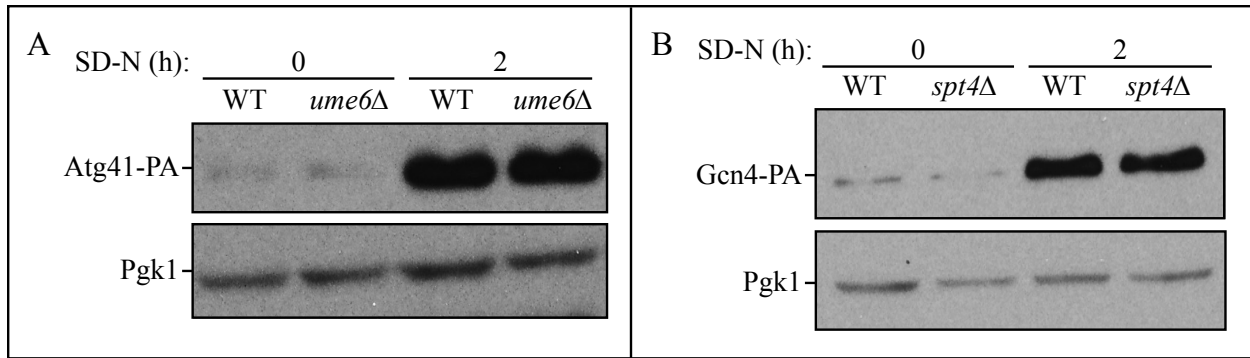

**Figure S7.** The transcription factors Ume6 and Gcn4 are not involved in Spt4-Spt5 complex regulation on autophagy. **(A)** The Atg41-PA protein level was detected with anti-PA antibody in WT (ZYY108) and *ume6Δ* (WXY129) cells in growing (SD-N, t=0 h) and starvation (SD-N, t=2 h) conditions. Anti-Pgk1 antiserum was used to detect the loading control. **(B)** The Gcn4-PA protein level was analyzed by western blot with the anti-PA antibody in WT (ZYY124) and *spt4Δ* (WXY130) strains.

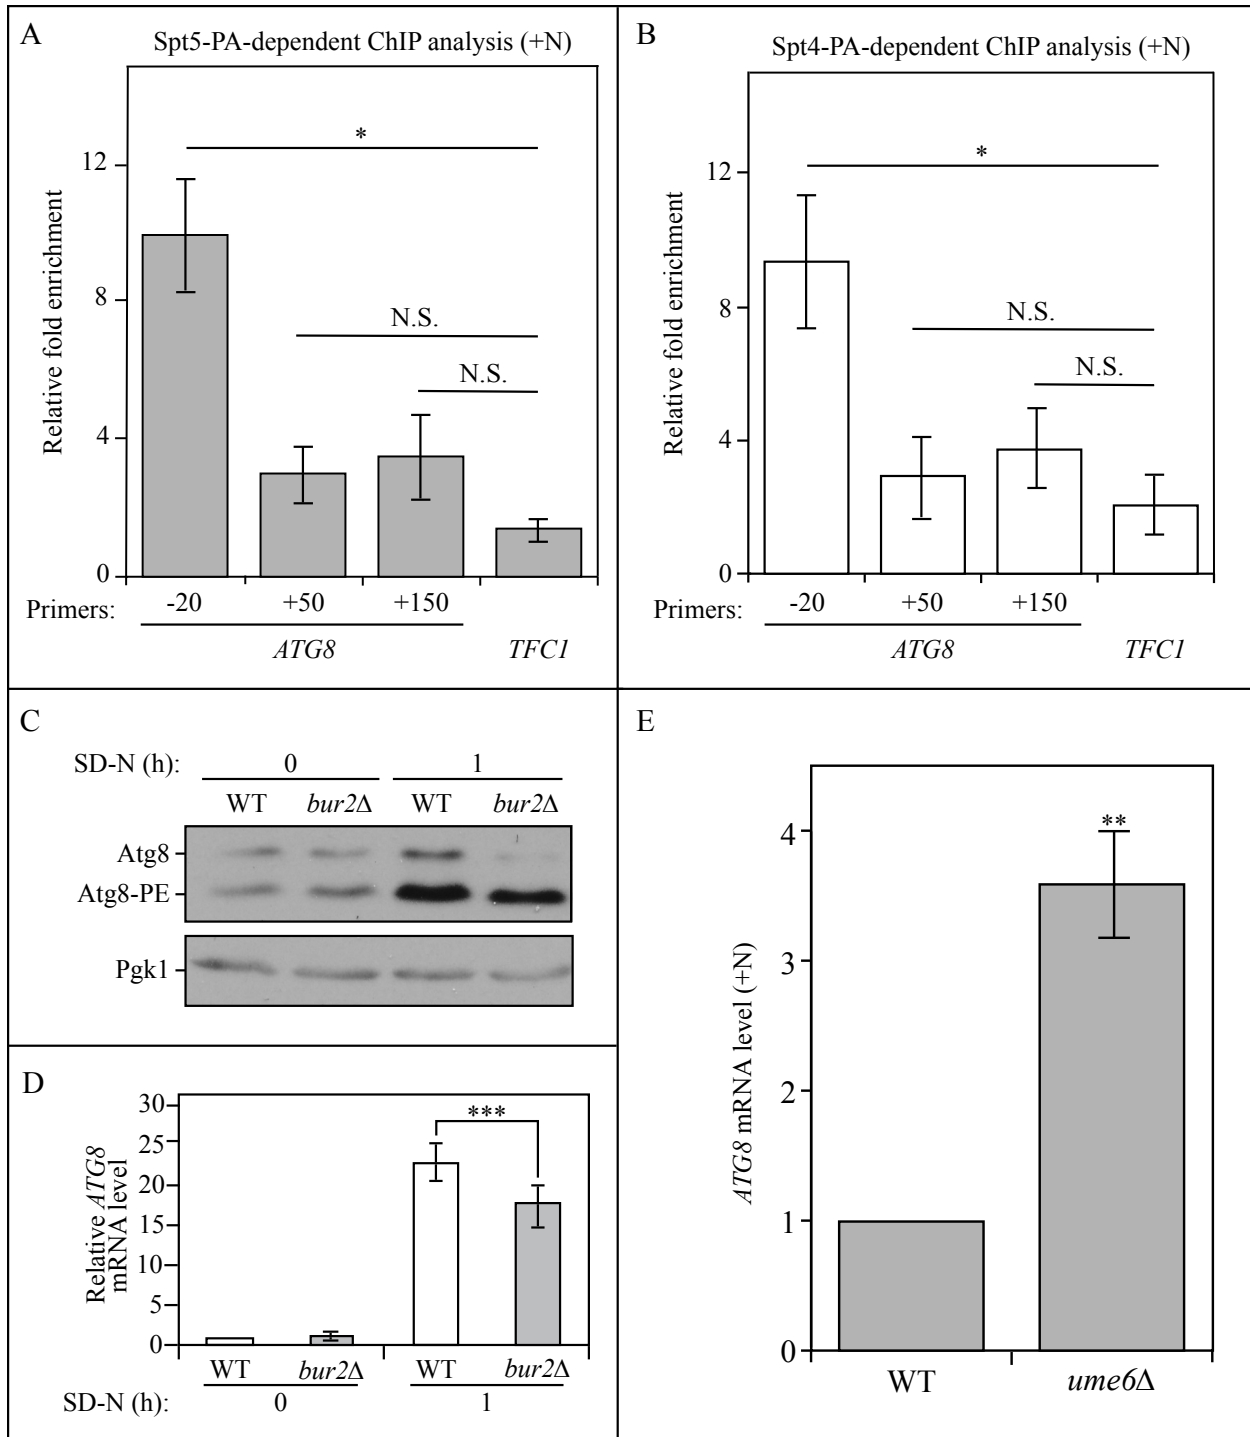

**Figure S8.** The direct binding of the Spt4-Spt5 complex with *ATG8* and the effect of the Sgv1/Bur1-Bur2 complex on *ATG8/Atg8*. (**A-B**) Spt5- and Spt4-dependent ChIP analysis (WXY102, WXY106) on different regions (-20, +50, +150) of *ATG8*. Results were normalized to the input DNA, and *TFCI* was used as a negative control for both strains. The error bars show the SEM of at least 3 independent experiments: \*,  $p < 0.05$ ; N.S., not significant. (**C**) The Atg8 protein level was detected by western blot with anti-Atg8 antiserum in wild-type (TVY1) and *bur2Δ*

(WXY101) samples collected from both growing (YPD) and starvation (SD-N, 1 h) conditions. (D) The wild-type (WLY176) and *bur2* $\Delta$  (WXY115) cells were cultured until mid-log phase in growing conditions (YPD) and then shifted to starvation (SD-N) for 1 h. The mRNA level of *ATG8* was measured by RT-qPCR. The error bar represents the SEM of 3 independent experiments, and p values are reported for the comparison between the wild-type and *bur2* $\Delta$  strains during starvation. \*\*\*,  $p < 0.005$ . (E) The *ATG8* mRNA level was measured by RT-qPCR in both WT and *ume6* $\Delta$  (JMY97) cells in growing conditions (YPD). Error bars represent the SEM of at least 3 independent experiments, and WT was set as 1. \*\*,  $p < 0.01$ .
